# Supplementary material
Source: PubMed Central journal article supplement (PMC3003021)
Supplement: 1013133107_pnas.201013133SI.pdf [file 1013133107_pnas.201013133SI.pdf]

# Supporting Information

Morbitzer et al. 10.1073/pnas.1013133107

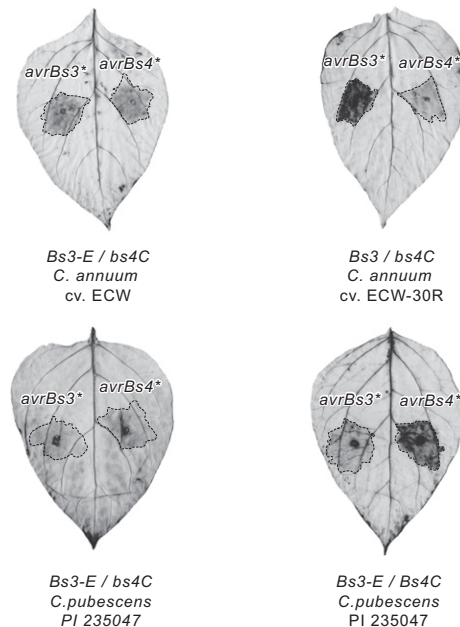

**Fig. S1.** Codon-optimized transcription activator-like effectors (TALE) genes of *avrBs3* and *avrBs4* trigger a hypersensitive response (HR) in *Bs3*- and *Bs4C*-resistant *Capsicum* species, respectively. *In planta* functional analysis of codon-optimized (\*) TALE genes. The 35S promoter-driven TALE genes indicated on the left and right sides of leaves were delivered via *Agrobacterium tumefaciens* into the four *Capsicum* genotypes shown. The allelic configuration at the *Bs3* locus [alleles: *Bs3* (recognition of *AvrBs3*), *Bs3-E* (recognition of *AvrBs3*Δrep16)] and the *Bs4C* locus [alleles: *Bs4C* (recognition of *AvrBs4*), *bs4C* (no recognition of *AvrBs3*, *AvrBs3*Δrep16, and *AvrBs4*)] is indicated for each plant genotype. Dashed lines mark the inoculated areas. Two days after infiltration, the leaves were cleared in ethanol to visualize the hypersensitive response (dark areas).

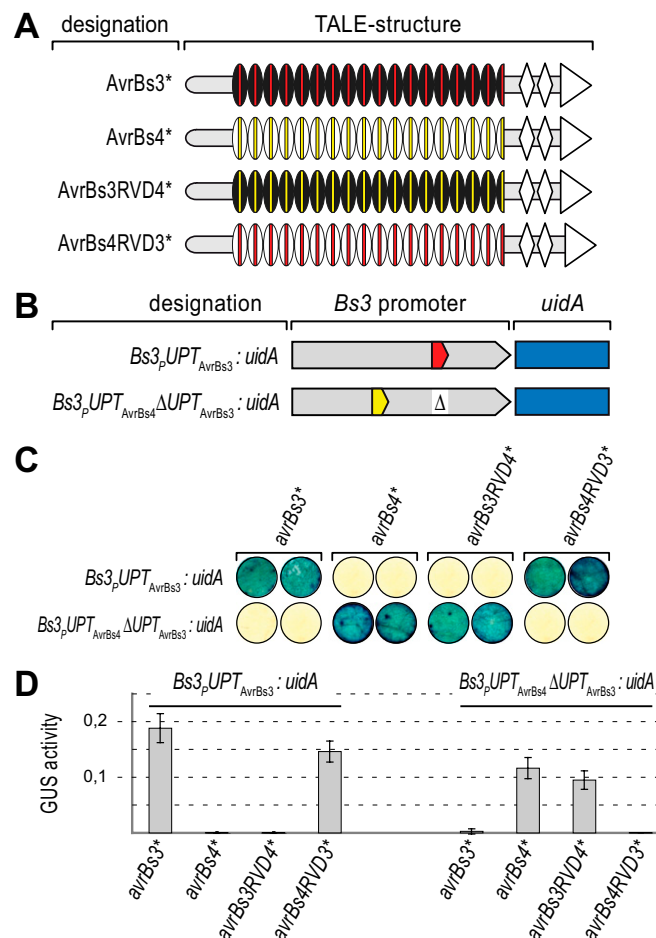

**Fig. S2.** TALE nonrepeat-variable diresidues (non-RVD) residues have no measurable influence on TALE specificity. (A) Graphic representation of chimeric TALEs and corresponding *uidA* reporter constructs. TALEs are displayed as gray bars. Black and white ovals represent the repeat units of AvrBs3 and AvrBs4, respectively. Red and yellow vertical lines within the ovals represent the RVDs of AvrBs3 and AvrBs4, respectively. The chimeric TALE AvrBs3RVD4 contains the RVDs of AvrBs4 but is otherwise identical to AvrBs3. Reciprocally, the chimeric TALE AvrBs4RVD3 contains the RVDs of AvrBs3 but is otherwise identical to AvrBs4. TALE nuclear localization signals (NLSs) and activation domain (AD) are displayed as white diamonds and white arrowheads, respectively. Asterisks (\*) indicate that proteins are translated from genes with optimized codon usage. (B) Graphic representation of *Bs3* promoter derivatives. Gray arrows represent the promoter of the pepper *Bs3* gene (*Bs3<sub>p</sub>*). Red and yellow arrowheads depict the *UPT<sub>AvrBs3</sub>* and the *UPT<sub>AvrBs4</sub>* boxes, respectively. The white area within the *Bs3<sub>p</sub>UPT<sub>AvrBs4</sub>ΔUPT<sub>AvrBs3</sub>* promoter indicates the deleted *UPT<sub>AvrBs3</sub>* box (Δ). Blue boxes represent the *uidA* reporter gene, encoding the β-glucuronidase (GUS) reporter protein. The nucleotide sequences of the promoters are provided as [SI Text](#). (C) RVDs of AvrBs3 and AvrBs4 retain promoter-activation specificity regardless of the repeat-array backbone. Depicted *uidA* reporter constructs were delivered into *Nicotiana benthamiana* leaves in combination with the depicted 35S-driven TALE genes. Asterisks (\*) indicate TALE genes with optimized codon usage. Leaf discs were stained with 5-bromo-4-chloro-3-indolyl-β-D-glucuronic acid, cyclohexylammonium salt (X-Gluc) to visualize activity of the GUS reporter. Samples were taken at 40 hpi. (D) Quantitative analysis of promoter activation via wild-type and chimeric TALEs. GUS activity (pmol 4-MU·min<sup>-1</sup>·g protein<sup>-1</sup>) was determined 27 h after *A. tumefaciens*-mediated codelivery of the depicted *uidA* reporter constructs and the 35S-driven TALE gene shown below columns. Error bars denote SD. Asterisks (\*) indicate TALE genes with optimized codon usage.

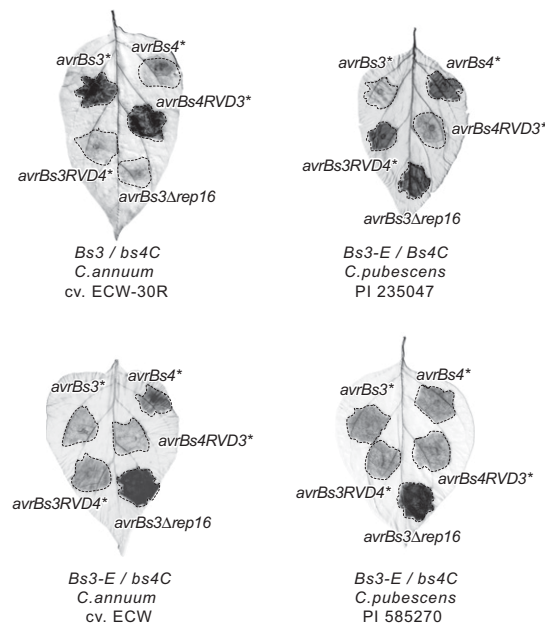

**Fig. S3.** *In planta* functional analysis of chimeric TALE genes. The 35S promoter-driven TALE genes indicated on the left and right side of the leaves were delivered via *A. tumefaciens* into leaves of the *Capiscum annuum* cultivars ECW and ECW-30R or the *Capiscum pubescens* accessions PI 585270 and PI 235047. The allelic configuration of the plant genotypes at the *Bs3* locus (alleles: *Bs3* or *Bs3-E*) and the *Bs4* locus (alleles: *Bs4C* or *bs4C*) is shown below the leaves. Dashed lines mark the inoculated areas. Two days after inoculation, the leaves were harvested and cleared with ethanol to visualize the HR (dark areas). Asterisks (\*) indicate that AvrBs3 was translated from a codon-optimized gene.

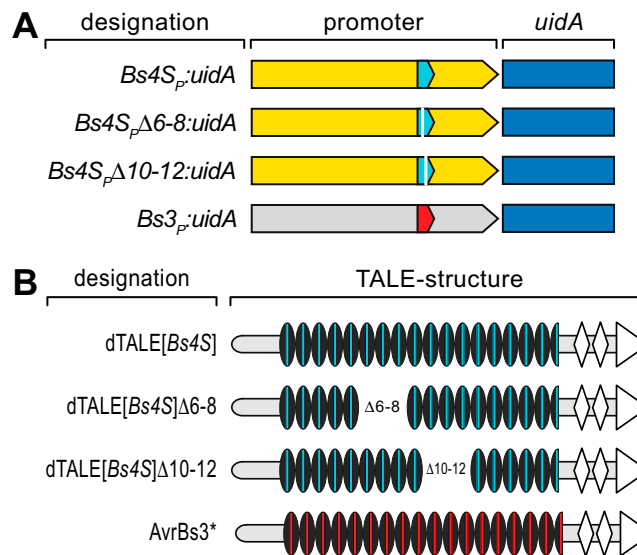

**Fig. S4.** Graphic display of *Bs4S* promoter:*uidA* reporter constructs and matching dTALES. Corresponding experimental data (Fig. 1). (A) Arrows represent the promoters of the tomato *Bs4S* (yellow) and the pepper *Bs3* gene (gray). Cyan and red arrowheads depict the  $UPT_{dTALE[Bs4S]}$  and  $UPT_{AvrBs3}$  boxes, respectively. White vertical bars within the cyan arrowheads represent deletions in the  $UPT_{dTALE[Bs4S]}$  box. Blue boxes represent the *uidA* reporter gene, encoding the GUS protein. The nucleotide sequences of the promoters are provided as [SI Text](#). (B) Graphic display of the TALEs used in this experiment. The TALEs are displayed as gray bars. Repeat units, NLSs, and AD are depicted as black ovals, white diamonds, and white arrowheads, respectively. Cyan and red colored vertical lines within the ovals represent the RVDs of designer TALEs (dTALE) [Bs4S] and AvrBs3\*, respectively. Repeat unit deletions in dTALE[Bs4S]Δ6–8 and dTALE[Bs4S]Δ10–12 are indicated. Asterisks (\*) indicate that the AvrBs3 is translated from a codon-optimized gene.

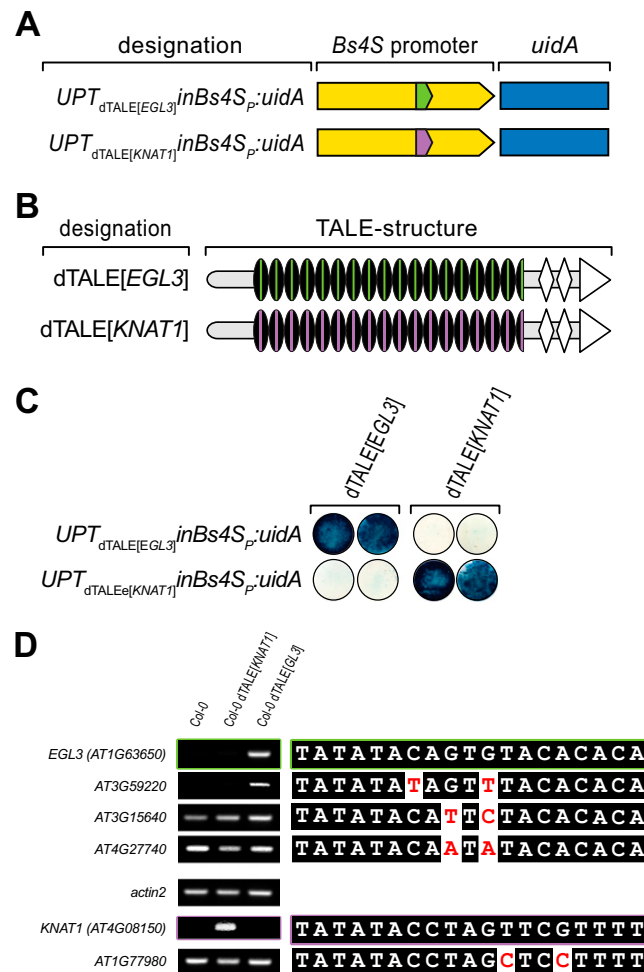

**Fig. S5.** Designer TALEs activate promoters of user-defined target genes in *Arabidopsis thaliana*. (A) Graphic display of promoter:*uidA* reporter constructs used in this experiment. Yellow arrows represent the promoter of the tomato *Bs4S* gene. Green and purple arrowheads depict the inserted  $UPT_{dTALE[EGL3]}$  and  $UPT_{dTALE[KNAT1]}$  boxes, respectively. Blue boxes represent the *uidA* reporter gene encoding the GUS protein. The nucleotide sequences of the promoters are provided as [SI Text](#). (B) Graphic display of engineered dTALEs. The dTALEs are displayed as gray bars. Repeat units, NLSs, and AD are displayed as black ovals, white diamonds, and white arrowheads, respectively. Green and purple colored vertical lines within the ovals represent the RVDs of  $dTALE[EGL3]$  and  $dTALE[KNAT1]$ , which direct binding to promoter elements of the *Arabidopsis* *EGL3* and *KNAT1* genes, respectively. Although not displayed graphically, both dTALEs contain a C-terminal GFP-tag that facilitates analysis of expression in vivo. (C) *In planta* functional analysis of different TALE-promoter combinations. The *uidA* reporter constructs under transcriptional control of the promoters indicated at left were delivered via *A. tumefaciens* into *N. benthamiana* leaves in combination with the 35S promoter-driven TALE genes shown above leaf discs. GUS assays were carried out 40 hpi as described in Fig. 1. (D) Analysis of potential  $dTALE[EGL3]$  and  $dTALE[KNAT1]$  off-targets in the *Arabidopsis* genome. Semiquantitative RT-PCR was carried out on RNA from the *Arabidopsis* ecotype Columbia (Col-0) and corresponding lines containing the 35S promoter-driven  $dTALE[EGL3]$ , or the  $dTALE[KNAT1]$  transgene. RNA was isolated from leaves and used for cDNA synthesis. Semiquantitative RT-PCR was performed with locus-specific primers ([SI Text](#)). The constitutively expressed gene *actin2* served as an internal normalization control. The boxes targeted by  $dTALE[EGL3]$  and  $dTALE[KNAT1]$  are shown on the right side and are highlighted with green and purple frames, respectively. Sequences of potential off-targets are displayed below the two distinct, user-defined boxes. Differences between the targeted box and the potential off-targets are displayed in boldface red font. Details on the genomic context of the targeted boxes and potential off targets are provided in the [SI Text](#).

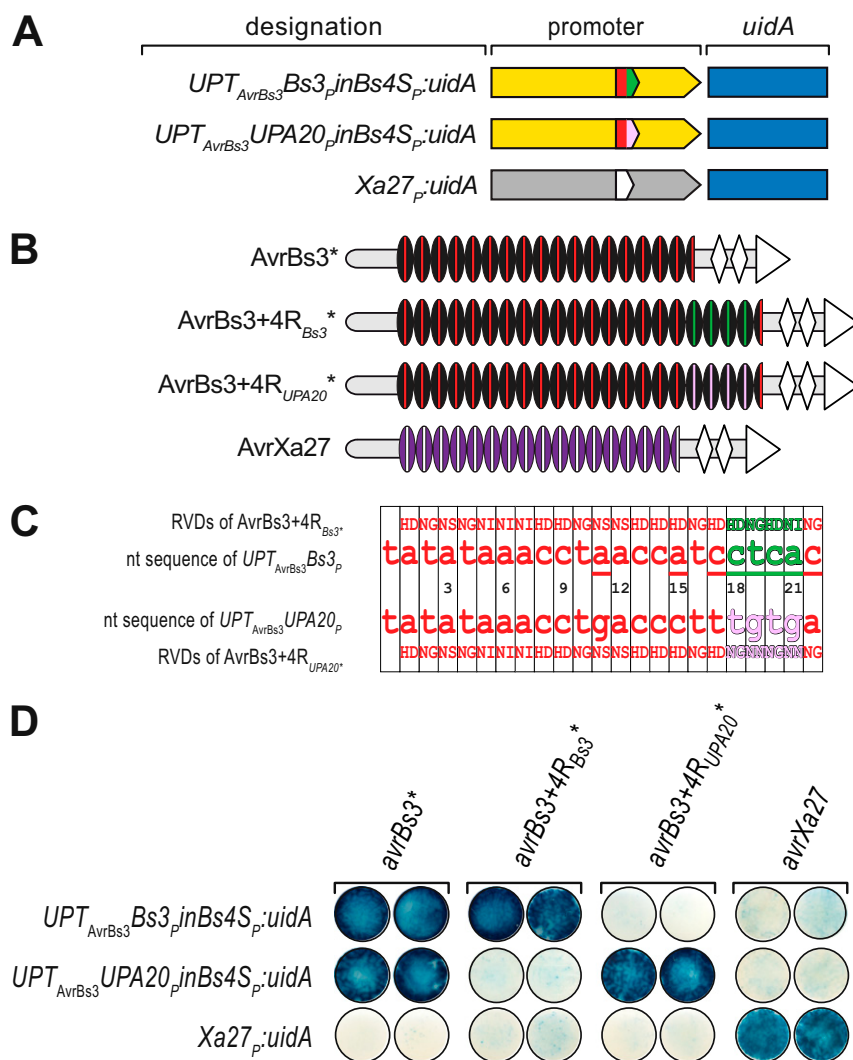

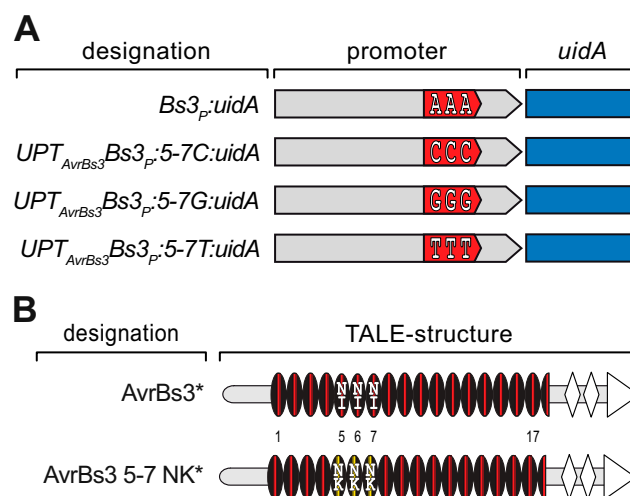

**Fig. S7.** Graphic display of AvrBs3 derivatives with three NK repeat units and corresponding *uidA* reporter constructs. For corresponding experimental data, see Fig. S8. (A) Gray arrows represent the pepper *Bs3* promoter. The red arrowhead with three tandem-arranged A nucleotides (AAA) depicts the wild-type *UPT<sub>AvrBs3</sub>* box of the *Bs3* promoter. *Bs3*-promoter derivatives in which three tandem-arranged A nucleotides of the *UPT<sub>AvrBs3</sub>* box are replaced by three C, G, or T nucleotides are depicted (CCC, GGG, and TTT). The nucleotide sequences of the promoters are provided in the S1 Text. Blue boxes represent the *uidA* reporter gene encoding the GUS protein. (B) Graphic display of the TALEs used in this experiment. The TALEs are displayed as gray bars. Repeat units, NLSs, and AD are depicted as black ovals, white diamonds, and white arrowheads, respectively. Red vertical lines within black ovals represent the RVDs of AvrBs3. Three tandem-arranged NI type RVDs that are present in repeat-unit residues 5 to 7 of the wild-type AvrBs3 protein are depicted. Yellow vertical lines within black ovals represent RVD residues within the AvrBs3 scaffold that were changed to NK-type residues. Asterisks (\*) indicate that TALEs are translated from codon-optimized genes.

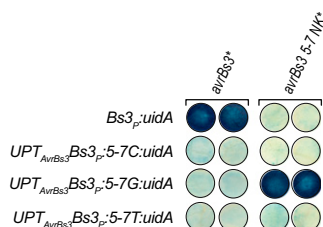

**Fig. S8.** The TALE RVD NK mediates specific targeting of G nucleotides. *In planta* functional analysis of different TALE-promoter combinations. The *uidA* reporter constructs under transcriptional control of the promoters indicated at left were codelivered via *A. tumefaciens* into *N. benthamiana* leaves with the 35S promoter-driven TALE genes indicated above leaf discs. GUS assays were carried out 40 hpi, as described in Fig. 1. Asterisks (\*) indicate TALE genes with optimized codon usage and corresponding gene products.

**Table S1. Nucleotide sequences of primers used in this study**

| Number | Designation                                | Nucleotide sequence                                  |
|--------|--------------------------------------------|------------------------------------------------------|
| RM 1   | AvrBs3*-CACC-F/RobM                        | CACCATGGATCCCATTAGGTCTAGG                            |
| RM 2   | AvrBs3*-ns-R/RobM                          | CTGTGGAAGCAATTCCATAAGCC                              |
| RM 3   | AvrBs3*-N-term-R/RobM                      | CCCGCATGCAATATTGAGCGGTGCCCCGTCAAAA                   |
| RM 4   | AvrBs3*-C-term-F/RobM                      | GGGAGTCATGGCCGGCCAGCACTTGAGTCGATTGTT                 |
| RM 5   | AvrBs3*-R6-XhoI-R/RobM                     | CGGTCTCGAGAGCCTGTTTACCTCCG                           |
| RM 6   | TAL[Bs4S]-R5-R/RobM                        | GCCATGAGCCTGGCATAGTACAGGTAGAAGCGC                    |
| RM 7   | TAL[Bs4S]-R9-F/RobM                        | CTTACACCAGAGCAAGTAGTTGCTATTGCATC                     |
| RM 8   | TAL[Bs4S]-R9-R/RobM                        | TCCATGTGCCTGGCATAAGACTGGCAGGAGC                      |
| RM 9   | TAL[Bs4S]-R13-F/RobM                       | CTAACCCCGAACAGGTGGTGGCTATTGCATCCC                    |
| RM 10  | AvrBs3*-R17-XhoI-F/RobM                    | GCACTCGAGACAGTCCAGAGATTGCTGCCG                       |
| RM 11  | AvrBs3*-R17-XhoI-R/RobM                    | CCCCTCGAGTGCCTGCTTTCCACCATCATGCGAAGCGATAGCTACTACC    |
| RM 12  | 4R <sub>Bs3</sub> XhoI-F/RobM              | CAAGCACTCGAGACCGTGCAGAGACTTCTG                       |
| RM 13  | 4R <sub>Bs3</sub> XhoI-R/RobM              | CGTCTCGAGAGCAGGTCTTCTCCACCG                          |
| RM 14  | 4R <sub>upa20</sub> XhoI-F/RobM            | GGCAAGCAGGCACTCGAGACAGTTTCAGAGACTG                   |
| RM 15  | 4R <sub>upa20</sub> XhoI-R/RobM            | CCCCTCGAGTGCCTGTTTGCCTCCGTTGTTGCTTGCGATAGCC          |
| RM 16  | UPT <sub>TAL[Bs4S]</sub> D6-8-R/RobM       | GACAATATATACAAGAAAGAAGAAATTAACAAGTACC                |
| RM 17  | UPT <sub>TAL[Bs4S]</sub> D10-12-R/RobM     | GAAGTTATATACAAGAAAGAAGAAATTAACAAGTACC                |
| RM 18  | UPT <sub>TAL[Bs4S]</sub> F/RobM            | CAAAATATCATCAATTGATCTCATCCATAC                       |
| RM 19  | UPT <sub>AvrBs4</sub> in3-F/PR             | TATAATTAATAATCCACTTCTGTTAAACAATGAACACGTTTGC          |
| RM 20  | UPT <sub>AvrBs4</sub> in3-R/PR             | GGTGTGCAAAATTGTGGTTTAAACC                            |
| RM 21  | DUPT <sub>AvrBs3</sub> inBs3p-F/RobM       | TCACAACTTCAAGTTATCATCCCC                             |
| RM 22  | DUPT <sub>AvrBs3</sub> inBs3p-R/RobM       | ATAAAATTGGTCAGGCAACGTTGTC                            |
| RM 23  | UPT <sub>AvrBs3/Bs3</sub> inBs4Sp-F/PR     | CAATTTTATTATATAAACCTAACCATCCTCACACGTTTCAAGTGGTACTTGT |
| RM 24  | UPT <sub>AvrBs3/upa20</sub> inBs4Sp-F/RobM | CTTCATCTTTATATAAACCTGACCTTTGTGACATGTTCAAGTGGTACTTGT  |
| RM 25  | UPT <sub>dTAL[EGL3]</sub> inBs4Sp-F/RobM   | TTTTGTGATTATATACAGGTACACACACCTAAAAGTTTCAAGTGGTACTTGT |
| RM 26  | UPT <sub>dTAL[KNAT1]</sub> inBs4Sp-F/RobM  | GACGAATTCTATATACCTAGTTCGTTTTTCTCCGTTTCAAGTGGTACTTGT  |
| RM 27  | Bs4p-R/PR                                  | GTGAAAGCTTGATTAACATTCGCTTTG                          |
| RM 28  | Bs4 RT1 F/RobM                             | CAAGATGATAAAAGACTAGAGCATGGAG                         |
| RM 29  | Bs4 RT1 R/RobM                             | TGGAAGAGATGCAATCTACGATCTGCT                          |
| RM 30  | RS-EFrt-F1                                 | AGTCAACTACCACTGGTCAC                                 |
| RM 31  | RS-EFrt-R1                                 | GTGCACTAGTACTTAGTGGTC                                |
| RM 32  | KNAT1 RT1 F                                | CAAGCTTACTTGGAAGTCCAAAAG                             |
| RM 33  | KNAT1 RT1 R                                | TTAACCAACATGTCACAGTATGCTTC                           |
| RM 34  | EGL3 RT1 F/RobM                            | CGCCGCGAGAAATTGAATGAACG                              |
| RM 35  | EGL3 RT1 R/RobM                            | CCATGCAACCTTTGAAGTGCC                                |
| RM 36  | actin2 RT F/RobM                           | GACTACGAGCAGATGGAAACC                                |
| RM 37  | actin2 RT R/RobM                           | CTGGACCTGCCTCATCATACTCGG                             |
| RM 38  | UPA20 RT F/RobM                            | GCACTACTACATCACAAGCAG                                |
| RM 39  | UPA20 RT R/RobM                            | CTAGAGGCTAGCTATAGTCAG                                |
| RM 40  | Cand-7-01-fwd                              | ATGAATCAGAATTGCTTTAATTCTTGTCA                        |
| RM 41  | Cand-7-01-rev                              | TGATTCTTGTGCTACATTTGTTCTTTCC                         |
| RM 42  | AT5G20270.1 K F/RobM                       | ACAACCAACGTGGTCACGCCAGTCC                            |
| RM 43  | AT5G20270.1 K R/RobM                       | GCAAAGAGTCCAGGGAATGTAACAAGATGG                       |
| RM 44  | AT3G15640 G F/RobM                         | AGAATCGTCTCCTCAGCTCAAAACC                            |
| RM 45  | AT3G15640 G R/RobM                         | ATCCGGAGGACCACAGGACCAACC                             |
| RM 46  | AT3G59220 G F/RobM                         | GAAGGTGAAGGAGCTGCTGTAGAAATGG                         |
| RM 47  | AT3G59220 G R/RobM                         | CAAACCCGTTCTTAGCATTCTGATAGTCATC                      |
| RM 48  | AT4G27740 G F/RobM                         | ATGGCAGCAAAACAAACTCTTCACG                            |
| RM 49  | AT4G27740 G R/RobM                         | TCTTTGGTCAACTTGAGCTTCTCGATGAC                        |

## Other Supporting Information Files

[SI Text \(DOC\)](#)
